# Supplementary material
Source: ML conference proceedings conference paper supplement (https://aclanthology.org/2021.dravidianlangtech-1.44)
Supplement: Software [file EACL-2021.xlsx]

## Sheet: offeval-stats
			Kannada					Tamil					Malayalam
				train	dev	test			train	dev	test			train	dev	test
			# samples	6217	777	778		# samples	35139	4388	4392		# samples	16010	1999	2001
	not-malayalam not-Kannada not-Tamil			1522					1454					1287
	Not_offensive			3544					25425					14153
	Offensive_Targeted_Insult_Individual			487					2343					239
	Offensive_Targeted_Insult_Group			329					2557					140
	Offensive_Targeted_Insult_Other			123					454					--
	Offensive_Untargetede			212					2906					191
				1151					8260					570
	hier_classifications
	lang_classy			6217					35139					16010
	off_not_classy			4695					33685					14723
	off_classy			1151					8260					570
	non_lang_classy			4695					33685					14723

## Sheet: offeval-ideas
	Title	Description	Things to do apart from running scripts
	Class imbalance
	Pretraining	pretrain with train+dev dataset for each lang	create pretraining datasets
	More Pretraining	collect relevant social media datasets for these three languages (eg collate all three langs, other tasks' datasets, etc.)
	Data augmentation	related English datasets, prefereably youtube comments datasets
	Data augmentation	all 3 langauge datasets collated for a common classification (6 outputs)	create dataset files-tran and dev. also seperate dev for each lang
	Hierarchical classification	Sequential, wherein, we first clasiffy tamil or not, then offensive or not and then what type of offensive

## Sheet: offeval-results
	model	remarks on inputted text	other remarks	f1 / acc on dev data			Metrics Table
				kannada	tamil	malayalam
	mBERT	as-is		67.30 / 70.79	76.79 / 79.01	95.77 / 96.10
	xlm-roberta			68.70 / 71.56	76.28 / 78.19	94.12 / 94.85
	ai4bharat
	xlm-roberta-large
	bert	transliterated to eng (indic-trans)		68.84 / 72.07	75.16 / 78.49	95.72 / 95.80
	xlm-roberta			67.73 / 71.17	75.73 / 78.08	94.18 / 95.00
	mBERT	as-is	pretrained w/ individual train+dev (as-is) data	68.40 / 72.07	76.95 / 78.87	96.58 / 96.75
	xlm-roberta			69.66 / 72.72	77.10 / 78.83	96.28 / 96.55
	bert	transliterated to eng (indic-trans)	pretrained w/ individual train+dev (transliterated) data	NA
	xlm-roberta
	xlm-roberta + w/ char bilstm embs	as-is						→ concatenated embs passed through BILSTM before classification layer
	xlm-roberta + w/ char bilstm embs	as-is	xlm part pretrained w/ individual train+dev (as-is) data.	69.94 / 72.72	76.91 / 78.94
	xlm-roberta + w/ fasttext embs	transliterated to eng (indic-trans)		67.51 / 71.30
	SUBMISSION
	mBERT (run-1)	as-is	pretrained w/ individual train+dev (as-is) data	69.88 / 73.49	76.04 / 78.30	96.48 / 96.65
	xlm-roberta (run-1)			69.72 / 72.59	76.80 / 79.40	95.80 / 96.25
	mBERT (run-2)	as-is	pretrained w/ individual train+dev (as-is) data	68.67 / 72.72	76.58 / 79.17	96.50 / 96.70
	xlm-roberta (run-2)			68.39 / 71.69	76.20 / 79.03	96.30 / 96.70
	mBERT (run-3)	as-is	pretrained w/ individual train+dev (as-is) data	66.28 / 70.91	76.30 / 79.54	96.04 / 96.55
	xlm-roberta (run-3)			69.08 / 71.94	77.86 / 78.71	96.17 / 96.30
	ENSEMBLE			70.30 / 74.00	76.94 / 79.67	96.76 / 97.00
	NOT REPORTING
	xlm-roberta	transliterated to eng (indic-trans)	pretrained model from Sai (on codemixed Hinglish-R)	69.41 / 72.33	75.66 / 78.37	95.77 / 96.15

## Sheet: hopespeech
	Language	Model	Remarks	Accuracy	Confusion Matrix
	English	BERT		92.96	0.62, 0.37 0.038, 0.961
		roberta	hope speech best	92.01	0.71 0.29 0.06 0.94
			overall best	93.38	0.66 0.33 0.04 0.96
								1: Hope Speech 2: Non-hope 3: Non-language
	Malayalam	mBERT		83.55	0.61 0.36 0.01 0.08 0.89 0.01 0.016 0.20 0.78
		xlm-roberta	best for hope_speech class	81.87	0.67 0.29 0.031 0.11 0.85 0.03 0.02 0.18 0.80
			overall best	83.46	0.63 0.33 0.03 0.08 0.88 0.03 0.0 0.16 0.83
			binary best hope	80.39	0.80 0.19 0.19 0.80
			binary overall best	85.42	0.75 0.24 0.12 0.87
	Tamil			0.6254	0.41 0.51 0.07 0.15 0.76 0.080 0.17 0.12 0.70

## Sheet: hopespeech_metric
Language	Model	Remarks	weighted f1 / accuracy	Confusion report
Malyalam	xlm roberta	binary	87.524 / 87.474
		binary with translated + transliterated	85.47/85.31
